# Supplementary material for: Health hackathons: theatre or substance? A survey assessment of outcomes from healthcare-focused hackathons in three countries
Source: PubMed Central journal article supplement — BMJ Innov. 2017 Jan 4;3(1):37–44. doi: 10.1136/bmjinnov-2016-000147 (PMC5293858; doi:10.1136/bmjinnov-2016-000147), 2017-01-04
Supplement: bmjinnov-2016-000147supp_table.pdf [file bmjinnov-2016-000147supp_table.pdf]

| <b>Supplementary Table 1: Survey Questions pertaining to primary outcomes</b> |                                                                                                                                                                                                                                                                                                       |
|-------------------------------------------------------------------------------|-------------------------------------------------------------------------------------------------------------------------------------------------------------------------------------------------------------------------------------------------------------------------------------------------------|
| <b>Outcome</b>                                                                | Survey Question                                                                                                                                                                                                                                                                                       |
| <b>Project Progress</b>                                                       |                                                                                                                                                                                                                                                                                                       |
| Disciplines represented on your team                                          | What are/were your backgrounds? (Check all that were represented.)<br>Medicine<br>Engineering<br>Business<br>Design<br>Life Sciences (e.g. Biology)<br>Other: _____                                                                                                                                   |
| Progress after hackathon                                                      | Have you or any other members of your team continued to work on your project since the hackathon?                                                                                                                                                                                                     |
| Initiated pilot testing                                                       | Have you initiated any of the following?<br>a. Piloting in a simulated/non-clinical setting (not on human subjects)<br>b. Piloting with people in a "training" or "simulated" format (i.e. WITHOUT patients)<br>c. Piloting in a clinical setting (i.e. WITH patients)<br>d. None of the above        |
| Non-monetary or monetary awards                                               | How many non-monetary awards has your team received? ____<br>How many monetary awards has your team received? ____<br>How much do the monetary awards amount to (in sum total)? ____<br>Please indicate the currency you used for the above question:<br>USD____<br>UGS____<br>INR____                |
| Prototype evolution                                                           | Has your prototype/solution evolved at all since the hackathon?<br>.....No<br>.....Somewhat; minor changes<br>.....Yes; significant or major changes                                                                                                                                                  |
| Commercialization progress                                                    | Which of the following have you/your team done?<br>.....Begun to write/completed a business plan<br>.....Formed a company<br>.....Applied for Intellectual Property (IP) rights/filed a patent(s)<br>.....Licensed your product/solution to a company/vendor*<br>.....None of the above               |
| Perception of alternative progress                                            | Indicate your agreement level to the statement: "I would have made similar progress on my project WITHOUT the hackathon."(Scale 1-5)<br>1) I wouldn't have made ANY progress on this project without the hackathon.<br>5) I would have progressed just as far (if not farther) without the hackathon. |
| <b>Individual Development</b>                                                 |                                                                                                                                                                                                                                                                                                       |
| Worked on other projects with new people                                      | Have you since worked on other project(s) with people you met through these hackathon(s)?                                                                                                                                                                                                             |

|                          |                                                                                                                                                                                                                                                                                                                                                    |
|--------------------------|----------------------------------------------------------------------------------------------------------------------------------------------------------------------------------------------------------------------------------------------------------------------------------------------------------------------------------------------------|
| Job/Position             | Did you or anyone on your team get a job, position, or other opportunity because of connections made at one of the hackathons listed above?                                                                                                                                                                                                        |
| Confidence/Self-efficacy | <p>Before the hackathon my confidence level in addressing and contributing to solving healthcare medtech challenges was high. (Scale 1-5)<br/> 1) Not at all - 5) Very much so</p> <p>After the hackathon my confidence level in tackling and solving healthcare medtech challenges was high. (Scale 1-5)<br/> 1) Not at all - 5) Very much so</p> |

\*Licensing is an agreement where the owner of a technological intellectual property allows another party to use, modify, or resell that property in exchange for compensation.
